# Supplementary material
Source: Springer Nature journal article supplement (https://www.springermedizin.de/resource/supplementary/13051_2009_24_MOESM1_ESM.pdf/9669782)

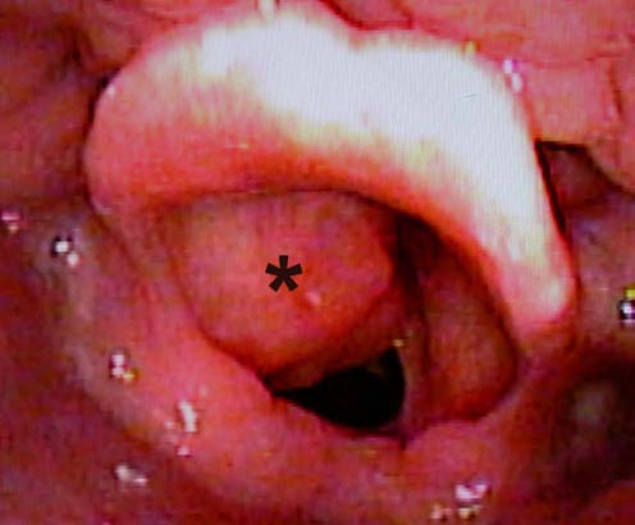

Supplement: MOESM1 [file 9669782]
